# Supplementary material for: Supply forecasting and profiling of urban supermarket chains based on tensor quantization exponential regression for social governance
Source: PeerJ Comput Sci. 2022 Nov 7;8:e1138. doi: 10.7717/peerj-cs.1138 (PMC9680888; doi:10.7717/peerj-cs.1138)
Supplement: Supplemental Information 18 [file peerj-cs-08-1138-s018.docx]

Supplemental Table S2:

High-order orthogonal iterations process.

| High-order orthogonal iterations |
| --- |
| 1. Truncate the high-order singular value decomposition to get the initial values of : , , .  2. :  2.1 Computed the high-order singular value decomposition of the matrix , and then selected the left singular vector corresponding to the largest singular values, and used the standard orthogonal basis of this space as the column vector of .  2.2 Computed the high-order singular value decomposition of the matrix , and then selected the left singular vector corresponding to the largest singular values, and used the standard orthogonal basis of this space as the column vector of .  2.3 Computed the high-order singular value decomposition of the matrix , and then selected the left singular vector corresponding to the largest singular values, and used the standard orthogonal basis of this space as the column vector of .  3. Reach the maximum number of iterations cutoff.  4. ， ，  5. Calculate the core matrix . |
